# Supplementary material for: Ancient DNA Reveals Matrilineal Continuity in Present-Day Poland over the Last Two Millennia
Source: PLoS One. 2014 Oct 22;9(10):e110839. doi: 10.1371/journal.pone.0110839 (PMC4206425; doi:10.1371/journal.pone.0110839)
Supplement: Figure S1 — Alignments of cloned aDNA sequences analyzed in this study. The first lines report the revised Cambridge Reference Sequence (rCRS) with the numbering of the nucleotide positions. (PDF) [file pone.0110839.s001.pdf]

12345678910111213141516171819202122232425262728293031323334353637383940414243444546474849505152535455565758596061626364656667686970717273747576777879808182838485868788899091929394959697989910010110210310410510610710810911011111211311411511611711811912012112212312412512612712812913013113213313413513613713813914014114214314414514614714814915015115215315415515615715815916016116216316416516616716816917017117217317417517617717817918018118218318418518618718818919019119219319419519619719819920020120220320420520620720820921021121221321421521621721821922022122222322422522622722822923023123223323423523623723823924024124224324424524624724824925025125225325425525625725825926026126226326426526626726826927027127227327427527627727827928028128228328428528628728828929029129229329429529629729829930030130230330430530630730830931031131231331431531631731831932032132232332432532632732832933033133233333433533633733833934034134234334434534634734834935035135235335435535635735835936036136236336436536636736836937037137237337437537637737837938038138238338438538638738838939039139239339439539639739839940040140240340440540640740840941041141241341441541641741841942042142242342442542642742842943043143243343443354364374384394404414424434444454464474484494504514524534544554564574584594604614624634644654664674684694704714724734744754764774784794804814824834844854864874884894904914924934944954964974984995005015025035045055065075085095105115125135145155165175185195205215225235245255265275285295305315325335345355365375385395405415425435445455465475485495505515525535545555565575585595605615625635645655665675685695705715725735745755765775785795805815825835845855865875885895905915925935945955965975985996006016026036046056066076086096106116126136146156166176186196206216226236246256266276286296306316326336346356366376386396406416426436446456466476486496506516526536546556566576586596606616626636646656666676686696706716726736746756766776786796806816826836846856866876886896906916926936946956966976986997007017027037047057067077087097107117127137147157167177187197207217227237247257267277287297307317327337347357367377387397407417427437447457467477487497507517527537547557567577587597607617627637647657667677687697707717727737747757767777787797807817827837847857867877887897907917927937947957967977987998008018028038048058068078088098108118128138148158168178188198208218228238248258268278288298308318328338348358368378388398408418428438448458468478488498508518528538548558568578588598608618628638648658668678688698708718728738748758768778788798808818828838848858868878888898908918928938948958968978988999009019029039049059069079089099109119129139149159169179189199209219229239249259269279289299309319329339349359369379389399409419429439449459469479489499509519529539549559569579589599609619629639649659669679689699709719729739749759769779789799809819829839849859869879889899909919929939949959969979989991000100110021003100410051006100710081009101010111012101310141015101610171018101910201021102210231024102510261027102810291030103110321033103410351036103710381039104010411042104310441045104610471048104910501051105210531054105510561057105810591060106110621063106410651066106710681069107010711072107310741075107610771078107910801081108210831084108510861087108810891090109110921093109410951096109710981099110011001110021100311004110051100611007110081100911010110111101211013110141101511016110171101811019110201102111022110231102411025110261102711028110291103011031110321103311034110351103611037110381103911040110411104211043110441104511046110471104811049110501105111052110531105411055110561105711058110591106011061110621106311064110651106611067110681106911070110711107211073110741107511076110771107811079110801108111082110831108411085110861108711088110891109011091110921109311094110951109611097110981109911100111001110021110031110041110051110061110071110081110091110101110111101211013110141101511016110171101811019110201102111022110231102411025110261102711028110291103011031110321103311034110351103611037110381103911040110411104211043110441104511046110471104811049110501105111052110531105411055110561105711058

[illegible][illegible]



[illegible][illegible][illegible][illegible]

ACGACCAGATGTGCCTACCATCGAACGGTGAATTGTCATCACTGCGCCGACGATGATATGACCTAATATCATCGACCGCTGTATGACATAAAACCGATCGCAGACAAACGCCCTCCGACATGTTACAGCGATGACAGCATGACCTGCACTTGACATGACATCAAGCGATCGAAGCGACCCCTCGCGCTAGATGACCGACAAACACTCCGACGCTBAGAGCTATGATGACATAAAGCATTTACCGATGACGATACAGCTGAAATCCCTCTGCGCCATCGAGACACCCCTCAG

clone 1 tooth 1 ..... T .. H1619 ..... C ... TT ... H16196  
clone 2 tooth 1 ..... C .....  
clone 3 tooth 1 ..... C .....  
clone 4 tooth 2 ..... C .....  
clone 5 tooth 2 ..... T ..... C .....  
clone 6 tooth 2 ..... A .....  
clone 7 tooth 2 .....  
clone 1 tooth 1 ..... L16181 ..... T ..... A ..... H16249  
clone 2 tooth 1 ..... C .....  
clone 3 tooth 1 ..... C .....  
clone 4 tooth 2 ..... C .....  
clone 5 tooth 2 ..... C .....  
clone 6 tooth 2 .....  
clone 1 tooth 1 ..... L16209 ..... C ..... H16356  
clone 2 tooth 1 .....  
clone 3 tooth 1 ..... C .....  
clone 4 tooth 1 .....  
clone 5 tooth 1 .....  
clone 6 tooth 1 ..... C .....  
clone 7 tooth 1 .....  
clone 8 tooth 1 ..... T .....  
clone 1 tooth 2 ..... L16249 ..... Y ..... H16317  
clone 2 tooth 2 .....  
clone 3 tooth 2 .....  
clone 4 tooth 2 .....  
clone 5 tooth 2 .....

[illegible][illegible]

[illegible][illegible][illegible]





clone 7 tooth 2  
clone 8 tooth 2  
clone 9 tooth 2  
clone 10 tooth 2

Sample C2 (ME)

chr8

clone 1 tooth 1  
clone 2 tooth 1  
clone 3 tooth 1  
clone 4 tooth 1  
clone 5 tooth 1  
clone 6 tooth 2  
clone 7 tooth 2  
clone 8 tooth 2  
clone 9 tooth 2  
clone 10 tooth 2  
clone 1 tooth 1  
clone 2 tooth 1  
clone 3 tooth 1  
clone 4 tooth 1  
clone 5 tooth 1  
clone 6 tooth 1  
clone 7 tooth 1  
clone 8 tooth 1  
clone 9 tooth 2  
clone 10 tooth 2  
clone 11 tooth 2  
clone 12 tooth 2  
clone 13 tooth 2  
clone 14 tooth 2  
clone 15 tooth 2  
clone 16 tooth 2

Sample C3 (ME)

chr8

clone 1 tooth 1  
clone 2 tooth 1  
clone 3 tooth 1  
clone 4 tooth 1  
clone 5 tooth 1  
clone 6 tooth 1  
clone 7 tooth 1  
clone 8 tooth 1  
clone 9 tooth 2  
clone 10 tooth 2  
clone 11 tooth 2  
clone 12 tooth 2  
clone 13 tooth 2  
clone 14 tooth 2  
clone 15 tooth 2  
clone 16 tooth 2  
clone 1 tooth 2  
clone 2 tooth 2  
clone 3 tooth 2  
clone 4 tooth 2  
clone 5 tooth 2  
clone 6 tooth 2  
clone 7 tooth 2  
clone 8 tooth 2  
clone 9 tooth 2  
clone 10 tooth 2  
clone 11 tooth 2  
clone 12 tooth 2  
clone 13 tooth 2  
clone 14 tooth 2  
clone 15 tooth 2  
clone 16 tooth 1

Sample C4 (ME)

chr8

clone 1 tooth 1  
clone 2 tooth 1  
clone 3 tooth 1  
clone 4 tooth 1  
clone 5 tooth 1  
clone 6 tooth 1  
clone 7 tooth 1  
clone 8 tooth 1  
clone 9 tooth 2  
clone 10 tooth 2  
clone 11 tooth 2  
clone 1 tooth 1  
clone 2 tooth 1  
clone 3 tooth 1  
clone 4 tooth 1  
clone 5 tooth 1  
clone 6 tooth 1  
clone 7 tooth 1  
clone 8 tooth 1  
clone 9 tooth 2  
clone 10 tooth 2  
clone 11 tooth 2

Sample C5 (ME)

chr8

clone 1 tooth 1  
clone 2 tooth 1  
clone 3 tooth 1  
clone 4 tooth 1  
clone 5 tooth 1  
clone 6 tooth 1  
clone 7 tooth 1  
clone 8 tooth 1  
clone 9 tooth 2  
clone 10 tooth 2  
clone 11 tooth 2  
clone 1 tooth 1  
clone 2 tooth 1  
clone 3 tooth 1  
clone 4 tooth 1  
clone 5 tooth 1  
clone 6 tooth 1  
clone 7 tooth 1  
clone 8 tooth 1  
clone 9 tooth 2  
clone 10 tooth 2  
clone 11 tooth 2



[illegible]





[illegible][illegible]
